# Supplementary material for: The High Impact of Staphylococcus aureus Biofilm Culture Medium on In Vitro Outcomes of Antimicrobial Activity of Wound Antiseptics and Antibiotic
Source: MDPI journal article supplement (doi:10.3390/pathogens10111385), 2021-10-26
Supplement: s1 [file s1]

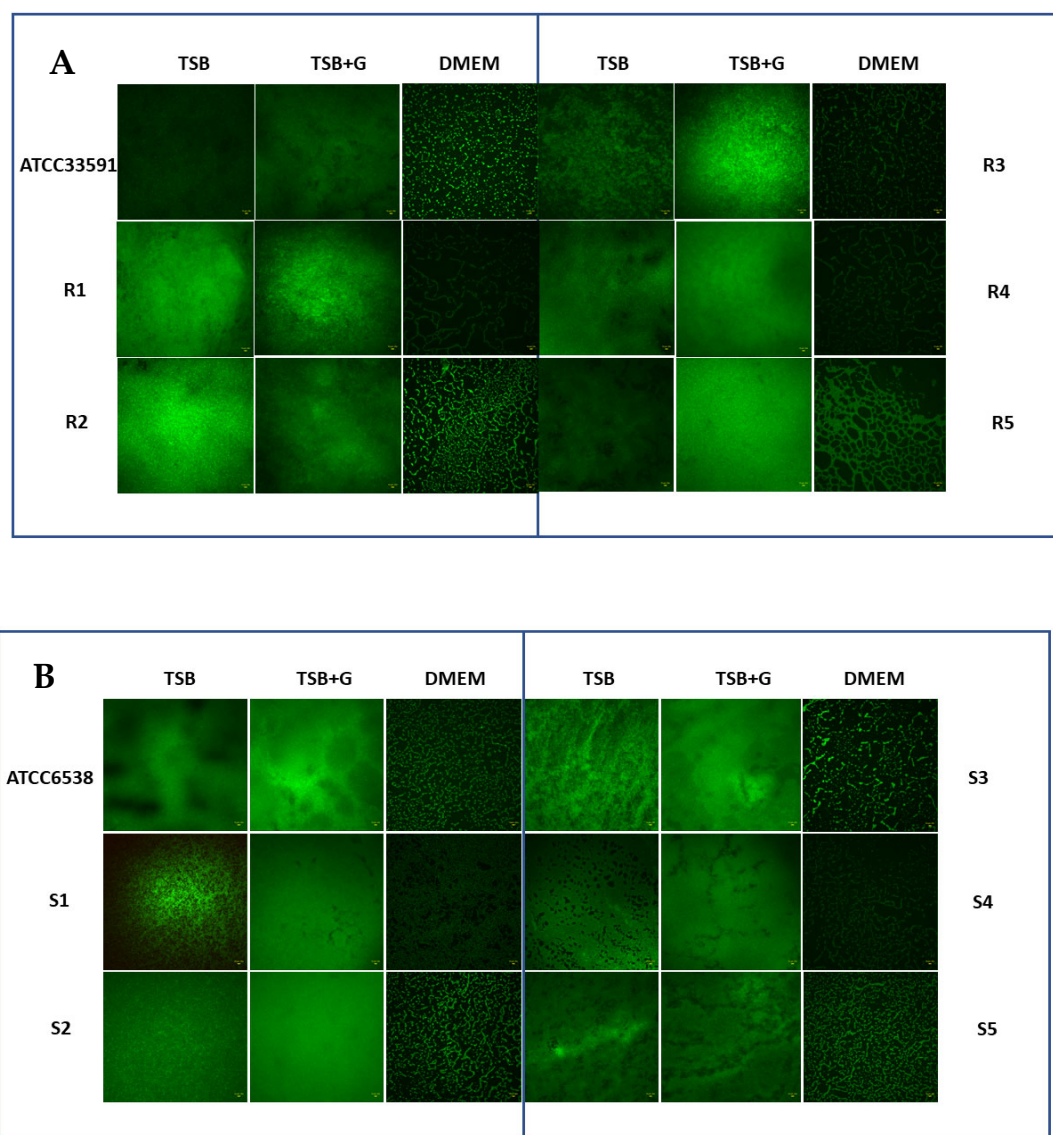

**Figure S1.** Live / Dead images of *Staphylococcus aureus* biofilm formed in three media: **TSB** - tryptic soy broth, **TSB+G** - tryptic soy broth supplemented with 1% glucose, **DMEM** - Dulbecco's Modified Eagle's Medium; **(A)** methicillin-susceptible (S1-S5 and ATCC 6538) *S. aureus* strains; **(B)** methicillin-resistant (R1-R5 and ATCC 33591) *S. aureus* strains; green—live cells, red/orange—dead cells.

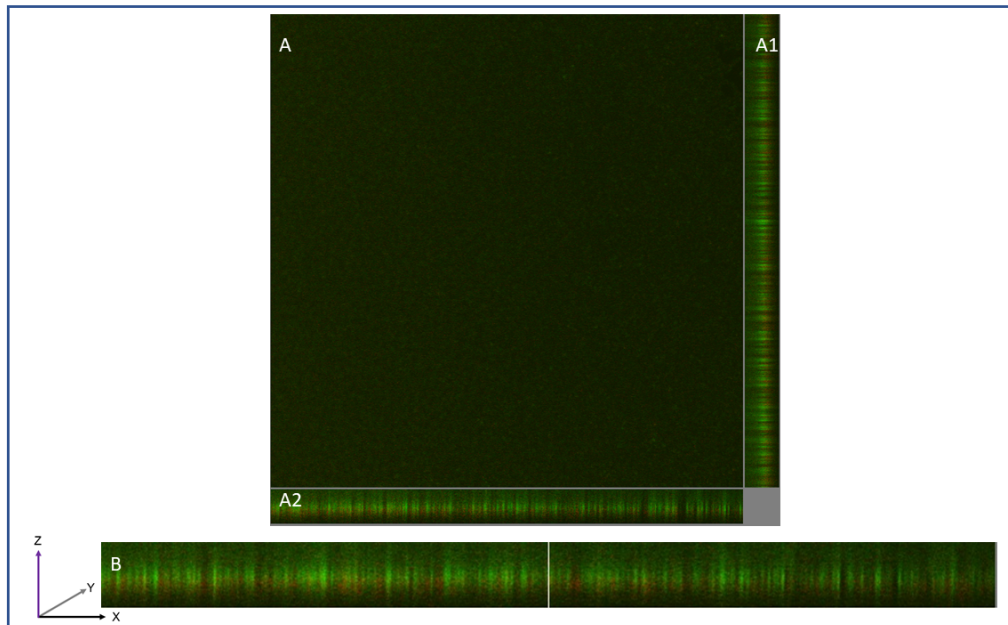

**Figure S2** Live / Dead visualization of *Staphylococcus aureus* biofilm (ATCC 33591); (A) aerial perspective; (A1, A2) cross-section of biofilm along Z-axis; (B) the Z-axis cross-section enlargement, for the higher visibility of distribution of cell-wall compromised cells (red) and cell-wall intact cells (green).

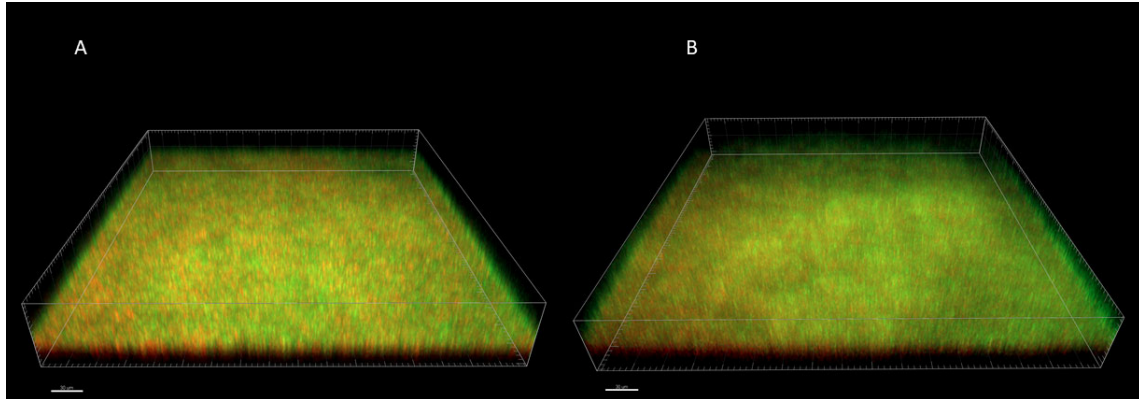

**Figure S3** 3D Live / Dead visualization of *Staphylococcus aureus* biofilm: (A) ATCC6538 and (B) ATCC 33591, with the use of Imaris 9.8 software; the side aerial perspective is presented; green—live cells, red/orange—dead cells.

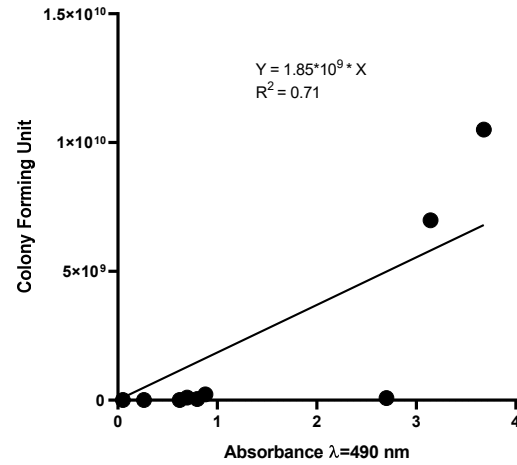

**Figure S4** Linear regression between number colony forming units of *Staphylococcus aureus* (axis Y) and its metabolic activity measured in Richard's method and presented as the level of absorbance (axis X); a mathematical equation of linear relationship and coefficient of determination ( $R^2$ ) are provided.

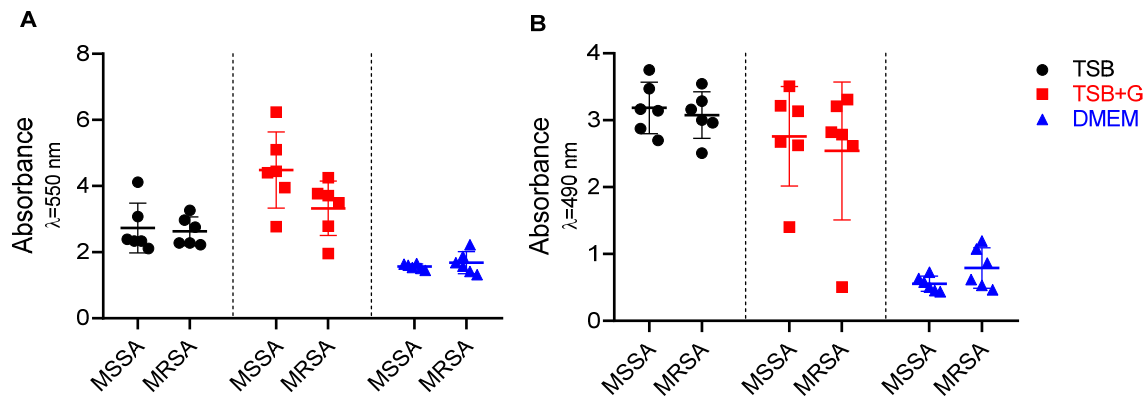

**Figure S5** Ability to form biofilm of MSSA - methicillin susceptible *Staphylococcus aureus* and MRSA - Methicillin resistant *Staphylococcus aureus* obtained in two methods: A – Crystal Violet method, B – Richard's method. Strains were cultivated in three media: TSB - tryptic soy broth, TSB+G - tryptic soy broth with 1% glucose, DMEM - Dulbecco's Modified Eagle Medium. An average and standard deviations are marked.

**Table S1.** Zones of growth inhibition of methicillin-susceptible (S1-S5, ATCC 6538) and methicillin-resistant (R1-R5, ATCC 33591) *Staphylococcus aureus* strains to gentamycin; S – susceptible to gentamicin ATCC – American Type Culture Collection.

| Strain     | Zone inhibition [mm] | Interpretation* |
|------------|----------------------|-----------------|
| S1         | 23                   | S               |
| S2         | 22                   | S               |
| S3         | 25                   | S               |
| S4         | 23                   | S               |
| S5         | 25                   | S               |
| ATCC 6538  | 26                   | S               |
| R1         | 25                   | S               |
| R2         | 24                   | S               |
| R3         | 26                   | S               |
| R4         | 23                   | S               |
| R5         | 25                   | S               |
| ATCC 33591 | 25                   | S               |

\* interpreted with the European Committee on Antimicrobial Susceptibility Testing. Breakpoint tables for interpretation of MICs and zone diameters, version 11.0, 2021

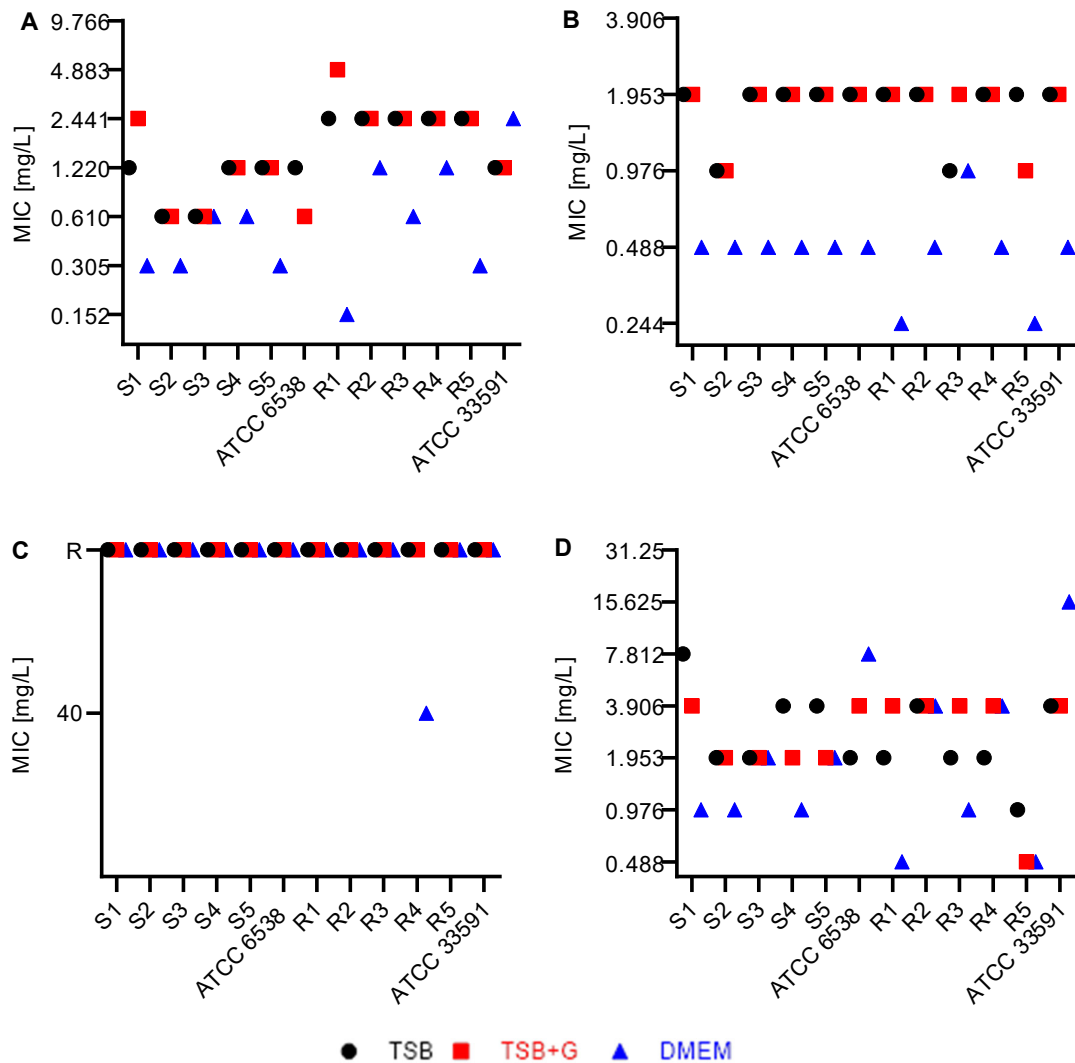

**Figure S6** Minimal inhibitory concentrations MIC of **A** – CHX chlorhexidine digluconate, **B** - PHMB polyhexanide, **C** – 0.008% NaClO/HClO antimicrobial agent, **D** – GENTA gentamycin sulphate of methicillin-susceptible (S1-S5), methicillin-resistance (R1-R2) and type (ATCC American Type Culture Collection) *Staphylococcus aureus* strains. Concentrations are presented in mg/L; **TSB** – tryptic soy broth, **TSB+G** - tryptic soy broth supplemented with 1% glucose, **DMEM** - Dulbecco's Modified Eagle's Medium; R – resistant to the highest tested concentration.

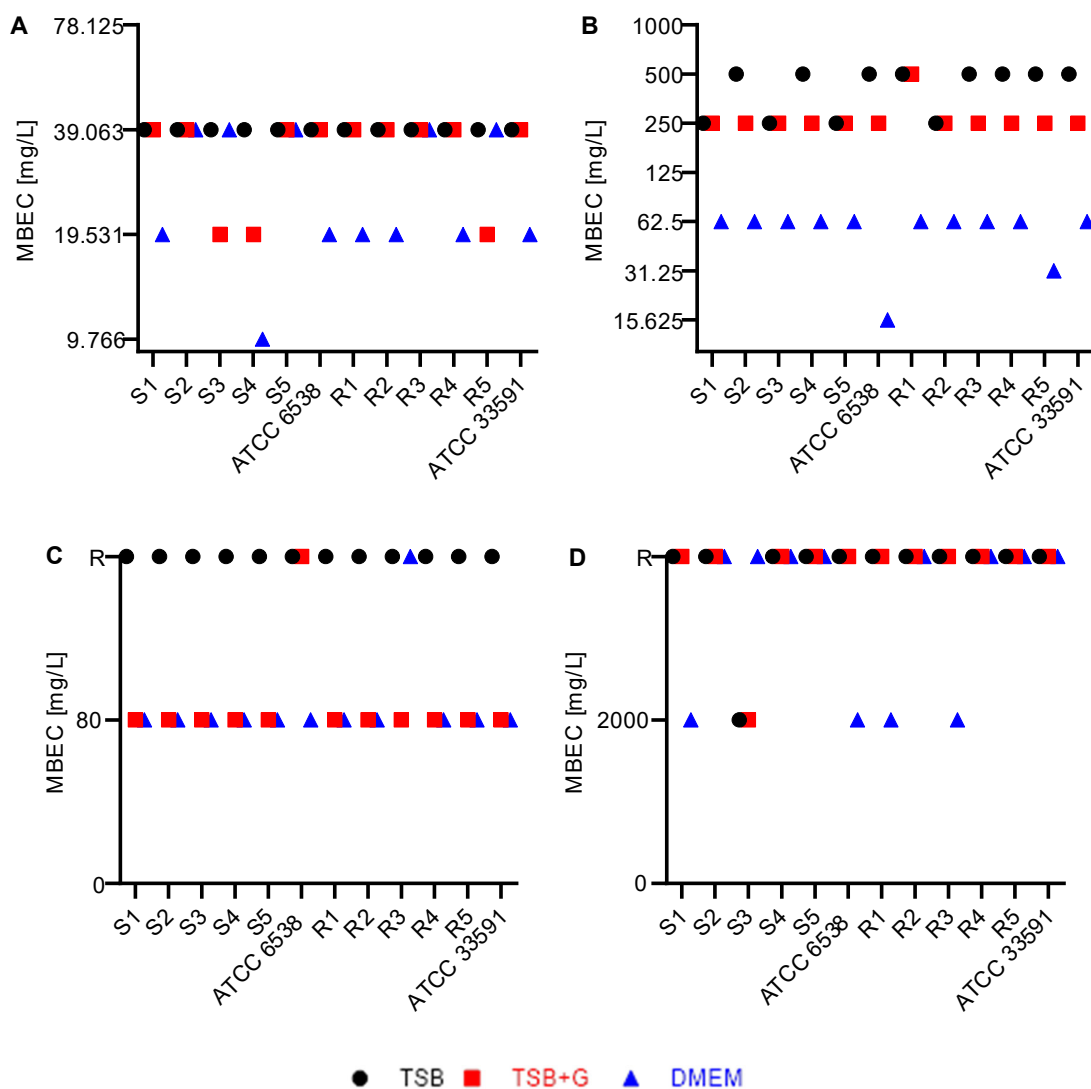

**Figure S7.** Minimal biofilm eradication concentrations MBEC of **A** – CHX chlorhexidine digluconate, **B** – PHMB polyhexanide, **C** – 0.008% NaClO/HClO antimicrobial agent, **D** – GENTA gentamycin sulphate of methicillin-susceptible (S1-S5), methicillin-resistance (R1-R2) and type (ATCC American Type Culture Collection) *Staphylococcus aureus* strains. Concentrations are presented in mg/L; **TSB** – tryptic soy broth, **TSB+G** tryptic soy broth supplemented with 1% glucose, **DMEM** – Dulbecco's Modified Eagle's Medium; R – resistant to the highest tested concentration.

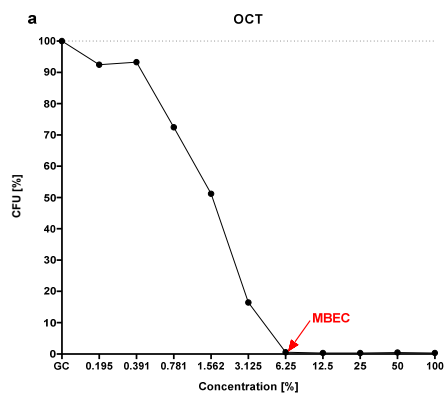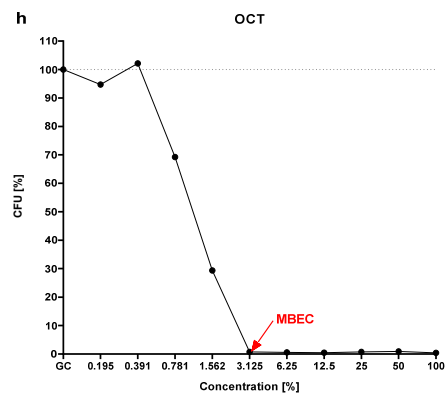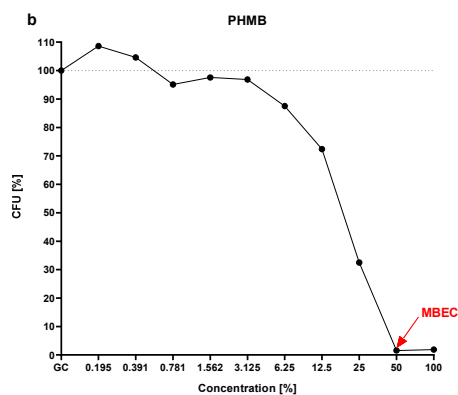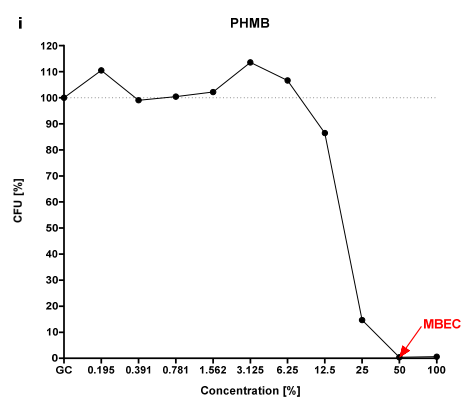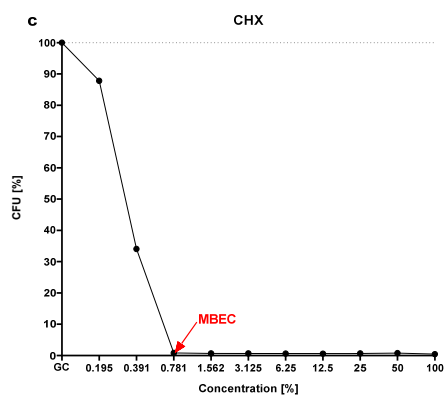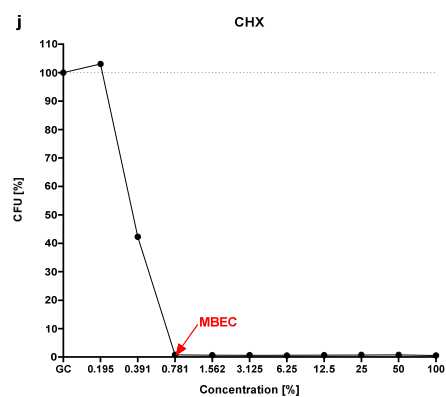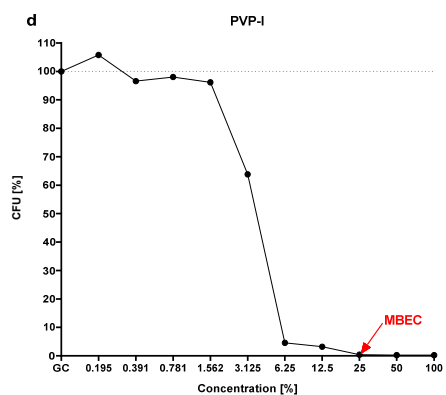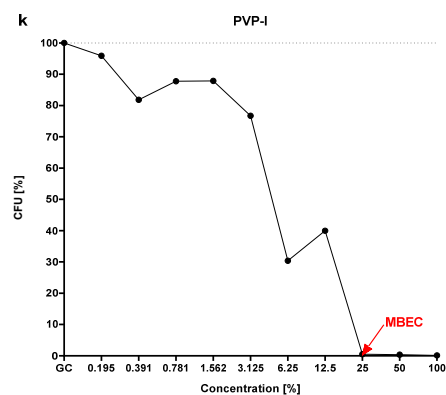

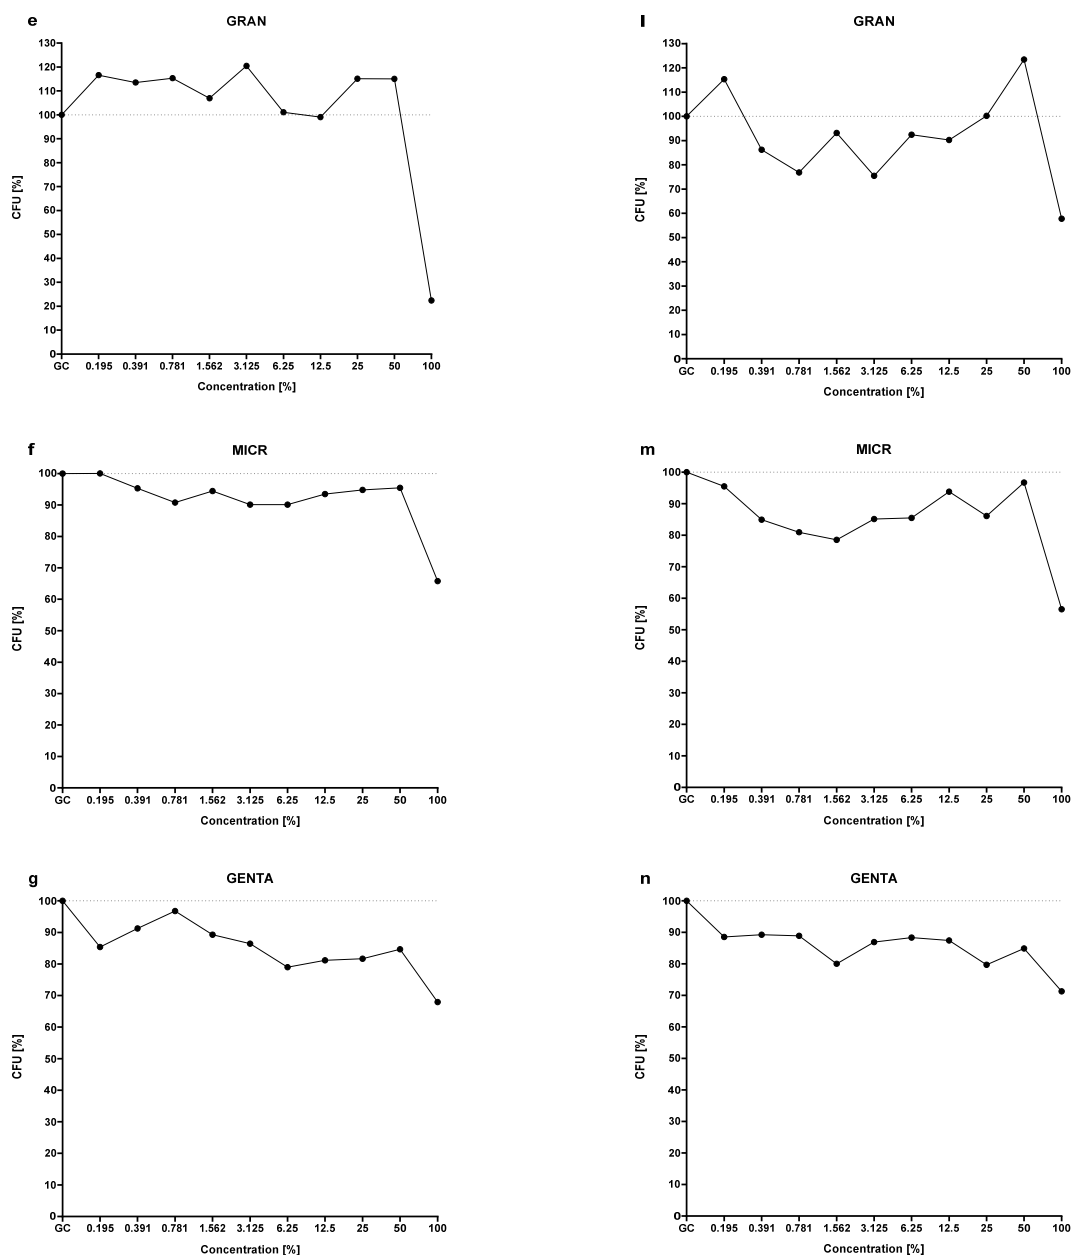

**Figure S8** Survivability of methicillin-susceptible ATCC 6538 (a, b, c, d, e, f, g) and methicillin-resistant ATCC 33591 (h, i, j, k, l, m, n) strains of *Staphylococcus aureus* cultured in tryptic soy broth presented as a percentage of Colony Forming Units CFU in comparison to the growth control (GC) under a range of dilutions of tested substances; **OCT** octenidine dihydrochloride (a,h), **PHMB** polyhexanide (b, i), **CHX** chlorhexidine digluconate (c, j), **PVP-I** povidone-iodine (d, k), **GRAN** 0,01% NaClO/HClO antimicrobial agent (e, l), **MICR** 0,008% NaClO/HClO antimicrobial agent (f, m), **GENTA** gentamicin sulfate (g, n); ATCC – American Type Culture Collection; red arrows show MBEC values recorded by TTC and quantitative culturing methods.
